# Supplementary material for: The Gavkhouni Wetland Dryness and Its Impact on Air Temperature Variability in the Eastern Part of the Zayandeh-Rud River Basin, Iran
Source: MDPI journal article supplement (doi:10.3390/w14020172), 2022-01-09
Supplement: s1 [file s1]

Archive with 1 entries (1 files):
- water-1478179-supplementary.pdf
