# Supplementary material for: The Gavkhouni Wetland Dryness and Its Impact on Air Temperature Variability in the Eastern Part of the Zayandeh-Rud River Basin, Iran
Source: MDPI journal article supplement (doi:10.3390/w14020172), 2022-01-09
Supplement: s1 [file s1 › water-1478179-supplementary.pdf]

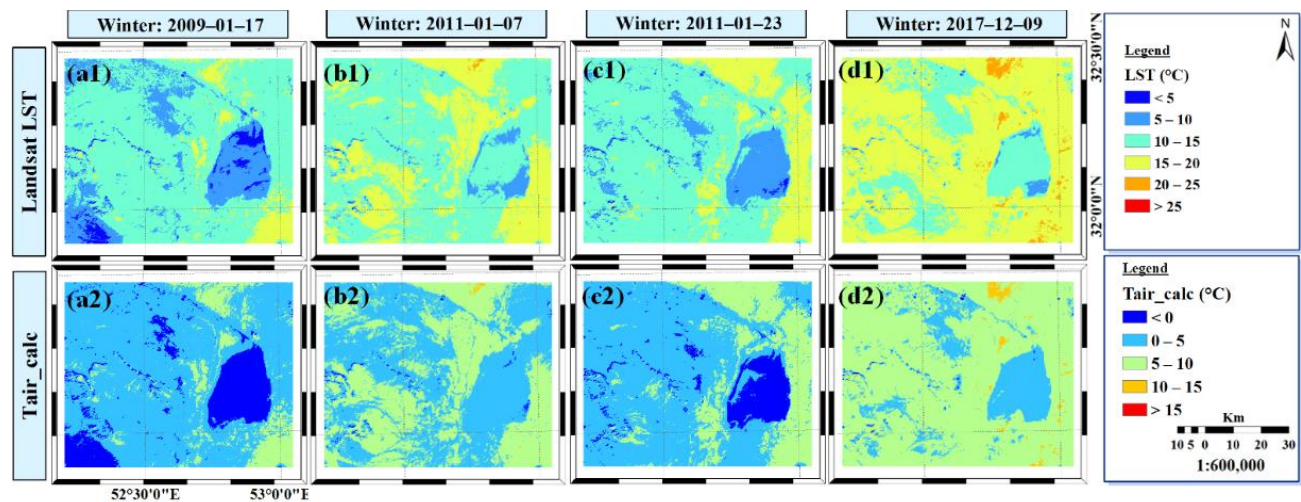

**Figure S1.** LST and Tair\_calc (°C) variability in the study area in winter: (a) 2009-01-17; (b) 2011-01-07; (c) 2011-01-23; (d) 2017-12-09.

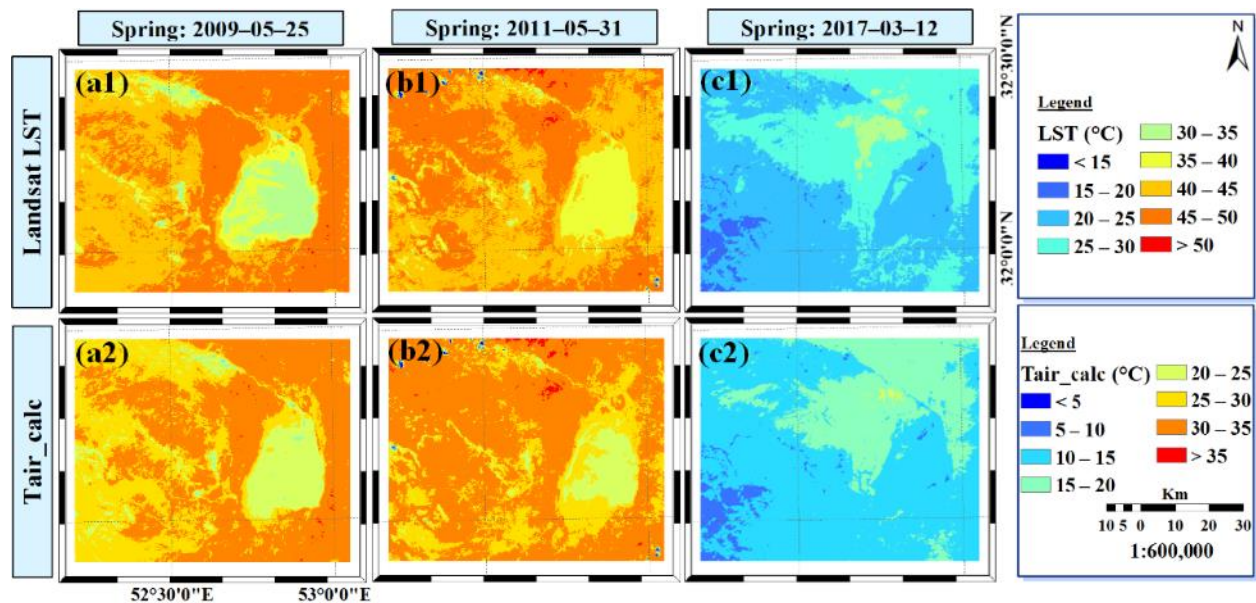

**Figure S2.** LST and Tair\_calc (°C) variability in the study area in spring: (a) 2009-05-25; (b) 2011-05-31; (c) 2017-03-12.

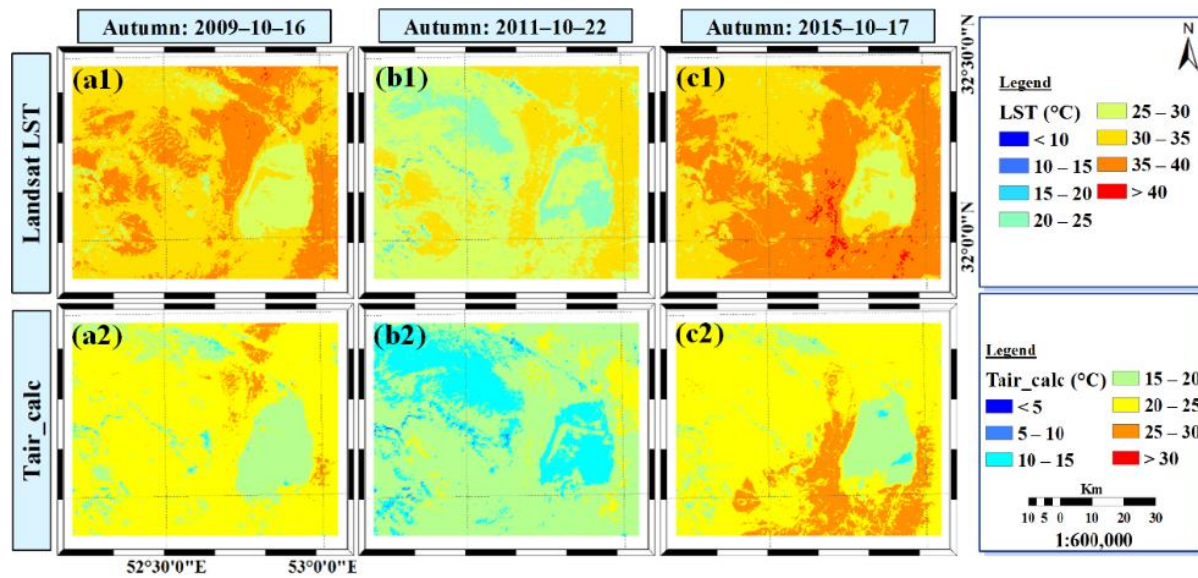

**Figure S3.** LST and Tair\_calc (°C) variability in the study area in autumn: (a) 2009-10-16; (b) 2011-10-22; (c) 2015-10-17.

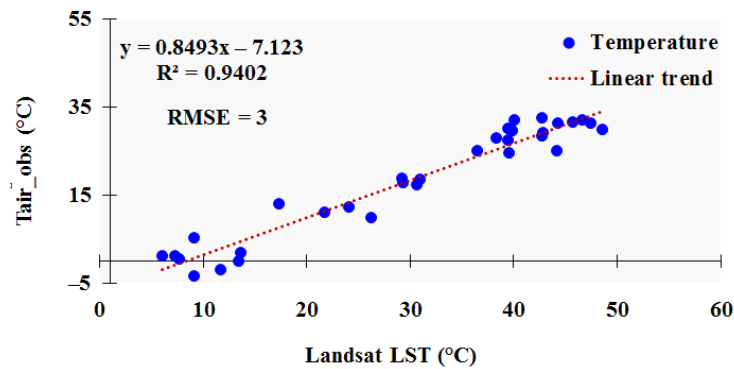

**Figure S4.** Linear regression between Landsat LST and Tair\_obs values at nearby meteorological stations (Varzaneh and Hasanabad) on the selected 16 days.

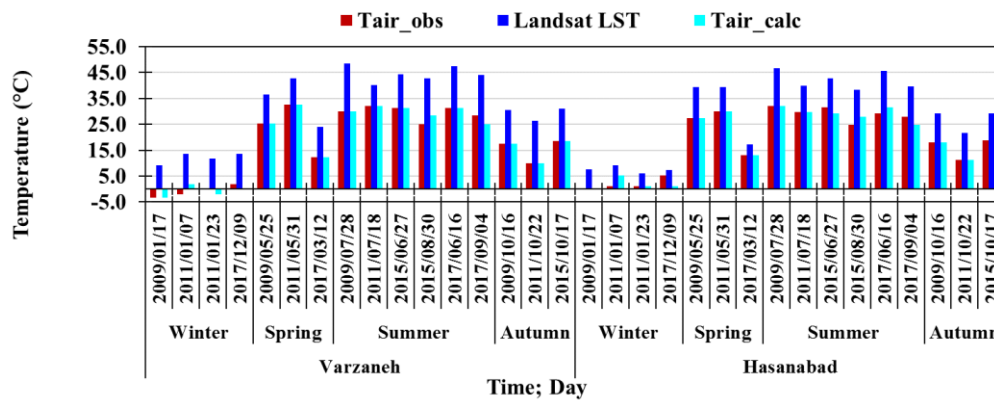

**Figure S5.** Tair\_calc, Tair\_obs and LST values at the meteorological stations on the selected 16 days.
